# Supplementary material
Source: HighWire-hosted journal article supplement (https://svn.smart01.highwire.org/content/svn-2024-003577)
Supplement: inline-supplementary-material-1 [file inline-supplementary-material-1.pdf]

Supplemental Table 1. Participation centres

| No. | Hospital                                                                | Primary Investigators |
|-----|-------------------------------------------------------------------------|-----------------------|
| 1   | Tianjin Huanhu Hospital                                                 | Jialing Wu            |
| 2   | Jiyuan Chinese Medical Hospital                                         | Hongqin Yang          |
| 3   | Sui Chinese Medical Hospital                                            | Ying Li               |
| 4   | The Third People’s Hospital of Liaocheng                                | Liguo Chang           |
| 5   | China-Japan Union Hospital of Jilin University                          | Ying Xing             |
| 6   | Weihai Wendeng District People’s Hospital                               | Jinguo Zhao           |
| 7   | Ningjin People's Hospital                                               | Chunjie Yang          |
| 8   | Nanle Zhongxing Hospital                                                | Yanna Ma              |
| 9   | Xingyang People's Hospital                                              | Haijun Wang           |
| 10  | Tianjin Xiqing Hospital                                                 | Liqing Dong           |
| 11  | North China University of Science and Technology<br>Affiliated Hospital | Bin Liu               |
| 12  | Beijing Tiantan Hospital, Capital Medical University                    | Yilong Wang           |
| 13  | Biyang People’s Hospital                                                | Shuo Zhang            |
| 14  | First Hospital of Shanxi Medical University                             | Shaoshuai Wang        |
| 15  | Yuci District People's Hospital                                         | Aishe Zhao            |
| 16  | Chongqing University Three Gorges Hospital                              | Shengli Chen          |
| 17  | Mengzhou People’s Hospital                                              | Dali Li               |
| 18  | Luoyang Central Hospital                                                | Zhihui Duan           |
| 19  | Liaocheng Central Hospital                                              | Xiting Zhang          |
| 20  | The Affiliated Hospital of Qingdao University                           | Aijun Ma              |
| 21  | Affiliated Hospital of Jining Medical University                        | Aimei Zhang           |
| 22  | West China Hospital, Sichuan University                                 | Bo Wu                 |

|    |                                                                                              |                 |
|----|----------------------------------------------------------------------------------------------|-----------------|
| 23 | Shenzhen Second People's Hospital                                                            | Gelin Xu        |
| 24 | Changzhou Wujin Traditional Chinese Medicine Hospital                                        | Xiaoli Feng     |
| 25 | The First Affiliated Hospital of Jinzhou Medical University                                  | Yujie Jia       |
| 26 | Xiangya Hospital, Central South University                                                   | Le Zhang        |
| 27 | The First People's Hospital of Chenzhou/The First Affiliated Hospital of Xiangnan University | Jiping Yi       |
| 28 | The Second Nanning People's Hospital                                                         | Zijun Wang      |
| 29 | Beijing Shunyi Hospital                                                                      | Mei Zhang       |
| 30 | Wuhan No.1 Hospital                                                                          | Zhangbao Guo    |
| 31 | Shanghai Pudong New Area Gongli Hospital                                                     | Qiang Li        |
| 32 | Dengzhou People's Hospital                                                                   | Guangliang Li   |
| 33 | Pingyu People's Hospital                                                                     | Feng Li         |
| 34 | Chongqing Donghua Hospital                                                                   | Yu Che          |
| 35 | Jiujiang University Affiliated Hospital                                                      | Xiaoping Yin    |
| 36 | Hengyang Central Hospital                                                                    | Jing Ding       |
| 37 | Xiuwu People's Hospital                                                                      | Guangming Kang  |
| 38 | Shimen People's Hospital                                                                     | Kaoling Gong    |
| 39 | The Fourth Affiliated Hospital of Soochow University                                         | Yonggang Hao    |
| 40 | Guanxian People's Hospital                                                                   | Haijun Qiu      |
| 41 | Benxi Central Hospital                                                                       | Chengguang Song |
| 42 | Baotou Central Hospital                                                                      | Baojun Wang     |
| 43 | Xi'an International Medical Center Hospital                                                  | Hong Lin        |
| 44 | Linfen Central Hospital                                                                      | Wanying Li      |
| 45 | Xinjiang Production&Construction Corps Hospital                                              | Yan Xiao        |

|    |                                                                                     |              |
|----|-------------------------------------------------------------------------------------|--------------|
| 46 | The First Affiliated Hospital of Wenzhou Medical University                         | Beilei Zhu   |
| 47 | General Hospital of Ningxia Medical University                                      | Xiaolin Hou  |
| 48 | Mengjin People's Hospital                                                           | Zhonghai Jia |
| 49 | The Sixth People's Hospital of Hengshui                                             | Qin Zhang    |
| 50 | Rudong People's Hospital                                                            | Jun Gu       |
| 51 | Affiliated Hangzhou First People's Hospital, Westlake University School of Medicine | Hao Zhang    |
| 52 | The Affiliated Hospital of Xuzhou Medical University                                | Dunjing Wang |
| 53 | Shenzhen Hospital, Southern Medical University                                      | Ming Hu      |
| 54 | Zouping City People's Hospital                                                      | Xiao Wang    |
| 55 | Luoning People's Hospital                                                           | Xiaomin Mei  |
| 56 | Zibo Central Hospital                                                               | Ying Wang    |
| 57 | The Eighth Medical Center of PLA General Hospital                                   | Feng Qiu     |
| 58 | Xinjiang Production and Construction Corps 13 Division Red Star Hospital            | Haiying Teng |

**Supplemental Table 2. Definitions of outcomes**

| Event                            | Definition                                                                                                                                                                                                                                                                                                                                                                                                                                                                                                                                                                 |
|----------------------------------|----------------------------------------------------------------------------------------------------------------------------------------------------------------------------------------------------------------------------------------------------------------------------------------------------------------------------------------------------------------------------------------------------------------------------------------------------------------------------------------------------------------------------------------------------------------------------|
| Early neurological deterioration | <p>New neurological symptoms or signs as well as the progression of existing neurological deficit symptoms or signs that occur within several hours or days of primary stroke onset, and will be judged based on any of the following criteria:</p> <p>(1) Total NIHSS score increases by <math>\geq 2</math> points;</p> <p>(2) NIHSS awareness score (1a to 1c) increases by <math>\geq 1</math> points;</p> <p>(3) NIHSS motor score (5a to 6b) increases by <math>\geq 1</math> points;</p> <p>(4) Any new neurological deficits not evaluated by NIHSS.</p>           |
| Stroke                           | <p>Sudden symptoms and signs of acute neurological deficits, which are related to cerebral circulatory disorders and caused by focal or whole brain, spinal cord, or retinal vascular injury. Stroke includes ischaemic stroke and hemorrhagic stroke.</p>                                                                                                                                                                                                                                                                                                                 |
| Ischaemic stroke                 | <p>Acute focal cerebral or retinal infarction meeting any of the following criteria:</p> <p>(1) Clinical signs or imaging evidence of acute newly onset focal neurological deficits lasting more than 24 hours, excluding other non-ischaemic causes (such as brain infections, brain trauma, brain tumors, seizures, severe metabolic diseases, degenerative neurological diseases, and drug side effects);</p> <p>(2) Acute cerebral or retinal ischaemic events, excluding other non-ischaemic causes, with focal symptoms or signs lasting less than 24 hours, but</p> |

|                                      |                                                                                                                                                                                                                                                                                                                                                                                                                                                                                                                                                                                                                                                                                                                                                                                                          |
|--------------------------------------|----------------------------------------------------------------------------------------------------------------------------------------------------------------------------------------------------------------------------------------------------------------------------------------------------------------------------------------------------------------------------------------------------------------------------------------------------------------------------------------------------------------------------------------------------------------------------------------------------------------------------------------------------------------------------------------------------------------------------------------------------------------------------------------------------------|
|                                      | <p>accompanied by imaging evidence of new infarction;</p> <p>(3) Progression of original vascular ischaemic stroke (i.e., NIHSS increased <math>\geq 4</math> on the basis of primary ischaemic stroke, excluding hemorrhagic transformation after infarction or symptomatic intracranial haemorrhage) lasting longer than 24 hours, accompanied by new ischaemic lesion on brain MRI or CT.</p> <p>Etiological classification is based on the TOAST standard.</p>                                                                                                                                                                                                                                                                                                                                       |
| Hemorrhagic stroke                   | Acute focal or whole brain or spinal cord neurological dysfunction caused by non-traumatic brain parenchymal, intraventricular, and subarachnoid haemorrhage.                                                                                                                                                                                                                                                                                                                                                                                                                                                                                                                                                                                                                                            |
| Symptomatic intracranial haemorrhage | <p>Spontaneous and secondary (or therapeutic) bleeding, which meets the following three conditions at the same time:</p> <p>(1) Imaging evidence (brain CT or MRI) of any form of intracranial haemorrhage (including the Heidelberg standard 1a, 1b, 1c, 2, 3a, 3b, 3c, and 3d) confirmed by imaging doctors;</p> <p>(2) Deterioration of clinical symptoms: total NIHSS score increases by <math>\geq 4</math> points compared to the final score before worsening, or any item of NIHSS score increases by <math>\geq 2</math> points, or leads to tracheal intubation, decompressive bone flap removal, ventricular drainage, or other significant medical/surgical interventions;</p> <p>(3) No other reason to explain the worsening of clinical symptoms apart from intracranial haemorrhage.</p> |

|                       |                                                                                                                                                                                                                                                                                                                                                                                                                                                                                                                                                                                                                                                                                                                                                                                                                                                                                                                                                                                                                                                                                                                                                                                                                                                                                                                                                                                                                                                                                                             |
|-----------------------|-------------------------------------------------------------------------------------------------------------------------------------------------------------------------------------------------------------------------------------------------------------------------------------------------------------------------------------------------------------------------------------------------------------------------------------------------------------------------------------------------------------------------------------------------------------------------------------------------------------------------------------------------------------------------------------------------------------------------------------------------------------------------------------------------------------------------------------------------------------------------------------------------------------------------------------------------------------------------------------------------------------------------------------------------------------------------------------------------------------------------------------------------------------------------------------------------------------------------------------------------------------------------------------------------------------------------------------------------------------------------------------------------------------------------------------------------------------------------------------------------------------|
| Myocardial infarction | <p>According to Third universal definition of myocardial infarction (Thygesen 2012), the term acute myocardial infarction (MI) should be used when there is evidence of myocardial necrosis in a clinical setting consistent with acute myocardial ischaemia. Under these conditions any one of the following criteria meets the diagnosis for MI:</p> <p>1. Detection of a rise and/or fall of cardiac biomarker values (preferably cardiac troponin [cTn]) with at least one value above the 99th percentile upper reference limit (URL) and with at least one of the following:</p> <p>(1) Symptoms of ischaemia.</p> <p>(2) New or presumed new significant ST-segment-T wave (ST-T) changes or new left bundle branch block (LBBB).</p> <p>(3) Development of pathological Q waves in the ECG.</p> <p>(4) Imaging evidence of new loss of viable myocardium or new regional wall motion abnormality.</p> <p>(5) Identification of an intracoronary thrombus by angiography or autopsy.</p> <p>2. Cardiac death with symptoms suggestive of myocardial ischaemia and presumed new ischaemic ECG changes or new LBBB, but death occurred before cardiac biomarkers were obtained, or before cardiac biomarker values would be increased.</p> <p>3. Percutaneous coronary intervention (PCI) related MI is arbitrarily defined by elevation of cTn values (<math>&gt;5\times 99</math>th percentile URL) in patients with normal baseline values (<math>\leq 99</math>th percentile URL) or a rise of</p> |
|-----------------------|-------------------------------------------------------------------------------------------------------------------------------------------------------------------------------------------------------------------------------------------------------------------------------------------------------------------------------------------------------------------------------------------------------------------------------------------------------------------------------------------------------------------------------------------------------------------------------------------------------------------------------------------------------------------------------------------------------------------------------------------------------------------------------------------------------------------------------------------------------------------------------------------------------------------------------------------------------------------------------------------------------------------------------------------------------------------------------------------------------------------------------------------------------------------------------------------------------------------------------------------------------------------------------------------------------------------------------------------------------------------------------------------------------------------------------------------------------------------------------------------------------------|

|                |                                                                                                                                                                                                                                                                                                                                                                                                                                                                                                                                                                                                                                                                                                                                                                                                                                                                                                                                                                                                                                                                                                                                                                   |
|----------------|-------------------------------------------------------------------------------------------------------------------------------------------------------------------------------------------------------------------------------------------------------------------------------------------------------------------------------------------------------------------------------------------------------------------------------------------------------------------------------------------------------------------------------------------------------------------------------------------------------------------------------------------------------------------------------------------------------------------------------------------------------------------------------------------------------------------------------------------------------------------------------------------------------------------------------------------------------------------------------------------------------------------------------------------------------------------------------------------------------------------------------------------------------------------|
|                | <p>cTn values &gt;20% if the baseline values are elevated and are stable or falling. In addition, either (1) symptoms suggestive of myocardial ischaemia or (2) new ischaemic ECG changes or (3) angiographic findings consistent with a procedural complication or (4) imaging demonstration of new loss of viable myocardium or new regional wall motion abnormality are required.</p> <p>4. Stent thrombosis associated with MI when detected by coronary angiography or autopsy in the setting of myocardial ischaemia and with a rise and/or fall of cardiac biomarker values with at least one value above the 99th percentile URL.</p> <p>5. Coronary artery bypass grafting (CABG) related MI is arbitrarily defined by elevation of cardiac biomarker values (<math>&gt; 10 \times</math> 99th percentile URL) in patients with normal baseline cTn values (<math>\leq</math>99th percentile URL). In addition, either (1) new pathological Q waves or new LBBB, or (2) angiographic documented new graft or new native coronary artery occlusion, or (3) imaging evidence of new loss of viable myocardium or new regional wall motion abnormality.</p> |
| Vascular death | <p>Death due to stroke, cardiac sudden death, acute myocardial infarction, heart failure, pulmonary embolism, cardiac/cerebrovascular intervention or surgery (unrelated to acute myocardial infarction), and other cardiovascular causes (such as arrhythmia irrelevant with sudden cardiac death, aortic aneurysm rupture, or peripheral arterial disease). Any death of unknown/unclear causes within 30 days after stroke, myocardial infarction, or cardio-cerebrovascular operation/surgery will be considered as death due to stroke, myocardial infarction, or cardio-</p>                                                                                                                                                                                                                                                                                                                                                                                                                                                                                                                                                                                |

|                                                              |                                                                                                                                                                                                                                                                                                                                                                                                                                                                                                                                                                                                                                                                                                                                                                                                                                   |
|--------------------------------------------------------------|-----------------------------------------------------------------------------------------------------------------------------------------------------------------------------------------------------------------------------------------------------------------------------------------------------------------------------------------------------------------------------------------------------------------------------------------------------------------------------------------------------------------------------------------------------------------------------------------------------------------------------------------------------------------------------------------------------------------------------------------------------------------------------------------------------------------------------------|
|                                                              | cerebrovascular operation/surgery respectively.                                                                                                                                                                                                                                                                                                                                                                                                                                                                                                                                                                                                                                                                                                                                                                                   |
| Any bleeding events                                          | <p>Bleeding event is classified as mild, moderate and severe bleeding event based on Global Utilisation of Streptokinase and Tissue Plasminogen Activator for Occluded Coronary Arteries Criteria:</p> <p>(1) Severe bleeding: Intracranial haemorrhage or bleeding causing hemodynamic changes and requiring blood transfusion or infusion, cardiotonic therapy, ventricular assist devices, surgery, or cardiopulmonary resuscitation to maintain sufficient cardiac output;</p> <p>(2) Moderate bleeding: Bleeding requiring blood transfusion but without hemodynamic changes requiring intervention;</p> <p>(3) Minor bleeding: Bleeding not requiring blood transfusion or infusion and without hemodynamic changes, including subcutaneous haemorrhage, small hematoma, or congestion spots at the puncture site, etc.</p> |
| Antibiotic associated diarrhoea, enteritis, and constipation | <p>Diarrhoea (loose or watery, mucous, bloody purulent, bloody stool, or the presence of lamellar or tubular pseudomembrane in the stool) with recent or current use of antibiotics, excluding other clear causes, including:</p> <p>(1) Various primary infectious diarrhoea, such as bacterial dysentery;</p> <p>(2) Organic intestinal diseases, such as inflammatory bowel disease;</p> <p>(3) Intestinal functional and allergic diseases;</p> <p>(4) Gastrointestinal surgery within 1 year, etc.</p> <p>Antibiotic associated diarrhoea can be further divided into simple diarrhoea and antibiotic</p>                                                                                                                                                                                                                    |



|                                 |                                                                                                                                                                                                                                                                                                                                                                                               |
|---------------------------------|-----------------------------------------------------------------------------------------------------------------------------------------------------------------------------------------------------------------------------------------------------------------------------------------------------------------------------------------------------------------------------------------------|
|                                 | <p>associated enteritis, such as mycotic colitis and pseudomembranous colitis (<i>Clostridium difficile</i> enteritis).</p> <p>Antibiotic associated constipation is defined as decreased stool frequency, decreased stool volume, dry stool, and exertion in defecation with recent or current use of antibiotics, excluding other organic or functional constipation with clear causes.</p> |
| Inflammation-related biomarkers | NF-L, S100B, copeptin, sTrem2, sGPVI, sADAMTS 13, sCD40L, sP-selectin, MMPs, Claudin-5, SPPI1, etc.                                                                                                                                                                                                                                                                                           |

Supplemental Table 3. Study organization

|                                                                                                                                            |
|--------------------------------------------------------------------------------------------------------------------------------------------|
| <b>Steering Committee</b>                                                                                                                  |
| Yilong Wang, Yongjun Wang, Philip Bath, S. Claiborne Johnston, Pierre Amarenco, Fudong Shi, Ling Guan                                      |
| <b>Executive Committee</b>                                                                                                                 |
| Yilong Wang, Ling Guan, Yao Lu, Baoshan Qiu, Lingling Jiang, Qianqian Yang, Meiyang Zhang, Dongyang Zhou, Chenhui Liu, Jianhua Li, Chen Xu |
| <b>Data Safety and Monitoring Board</b>                                                                                                    |
| Jean-Paul Collet, Hao Li, David Wang                                                                                                       |
| <b>Statistical and Data Management Centre</b>                                                                                              |
| Yuesong Pan, Luyan Wang, Ziyi Gao                                                                                                          |
| <b>Clinical Event Adjudication Committee</b>                                                                                               |
| Hui Qu, Kehui Dong, Xiaoling Liao                                                                                                          |

Supplemental Table 4. Previous clinical studies of minocycline applying on patients with acute ischaemic stroke

| PMID     | Patients             | Design                       | N   | Age | NIHSS | Time window     | Dosage of medication                               | Main outcomes                                        |
|----------|----------------------|------------------------------|-----|-----|-------|-----------------|----------------------------------------------------|------------------------------------------------------|
| 23105953 | AIS                  | Open-label<br>Non-randomised | 89  | >18 | >1    | < 6 h of onset  | 3, 4.5, 6, or 10mg/kg per 12h intravenously for 3d | IL-6 level at 24h<br>NIHSS score at 90d              |
| 21737808 | AIS                  | Open-label<br>Non-randomised | 104 | >18 | >1    | < 6 h of onset  | 3, 4.5, 6, or 10mg/kg per 12h intravenously for 3d | MMP-9 level at 24h<br>NIHSS score at discharge or 7d |
| 17909152 | AIS                  | Open-label<br>Randomised     | 152 | >18 | >5    | 6-24h of onset  | 200mg per day orally for 5d                        | NIHSS, mRS, and BI score at 7, 30, 90d               |
| 22406775 | First-ever AIS       | Open-label<br>Randomised     | 50  | >18 | >4    | 6-24h of onset  | 200mg per day orally for 5d                        | NIHSS, mRS, and mBI score at 1, 7, 30, 90d           |
| 23868273 | Stroke<br>( AIS 81%) | Open-label<br>Randomised     | 95  | ≥18 | ≥1    | < 24 h of onset | 100mg per 12h intravenously for 2.5d               | mRS and BI score at 90d<br>NIHSS at 7d               |

NIHSS, National Institute of Health Stroke Scale; AIS, acute ischaemic stroke; mRS, modified Rankin Scale; BI, Barthel Index.
